# Supplementary material
Source: publisher figshare collection journal article supplement (https://aacr.figshare.com/articles/dataset/_/22364033)
Supplement: Supplementary file 1 [file 39808256]

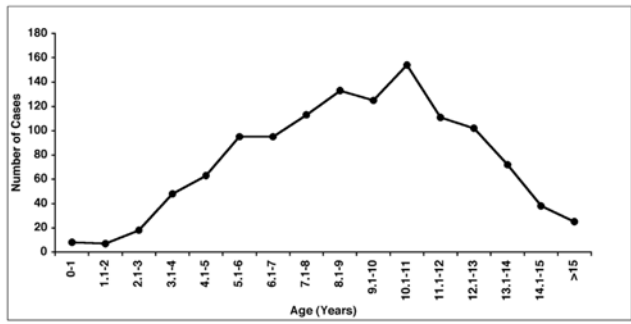

Supplementary Figure 1. Modiano et al

Number of total LPD occurrences for each age group (1-yr intervals).
